1  
2  
3  
4  
5  
6  
7  
8  
9  
10  
11  
12  
13  
14  
15  
16  
17  
18  
19  
20  
21  
22  
23  
24  
25  
26  
27  
28  
29  
30  
31  
32  
33  
34  
35  
36  
37  
38  
39  
40  
41  
42  
43  
44  
45  
46

## **BIONIC: Biological Network Integration using Convolutions**

Duncan T. Forster<sup>1,2</sup>  
Charles Boone<sup>1,2,3,\*</sup>  
Gary D. Bader<sup>1,2,4,\*</sup>  
Bo Wang<sup>4,5,6,7,\*</sup>

1. Department of Molecular Genetics, University of Toronto, Toronto ON, Canada
  2. The Donnelly Centre, University of Toronto, Toronto ON, Canada
  3. Chemical Genomics Research Group, RIKEN Center for Sustainable Resource Sciences, Saitama, Japan
  4. Department of Computer Science, University of Toronto, Toronto ON, Canada
  5. Vector Institute for Artificial Intelligence, Toronto ON, Canada
  6. Department of Laboratory Medicine and Pathobiology, University of Toronto, Toronto ON, Canada
  7. Peter Munk Cardiac Center, University Health Network, Toronto ON, Canada
- \* Corresponding author

47  
48  
49  
50  
51  
52  
53  
54  
55  
56  
57  
58  
59  
60  
61  
62  
63  
64  
65  
66

## Abstract

Biological networks constructed from varied data, including protein-protein interactions, gene expression data, and genetic interactions can be used to map cellular function, but each data type has individual limitations such as bias and incompleteness. Unsupervised network integration promises to address these limitations by combining and automatically weighting input information to obtain a more accurate and comprehensive result. However, existing unsupervised network integration methods fail to adequately scale to the number of nodes and networks present in genome-scale data and do not handle partial network overlap. To address these issues, we developed an unsupervised deep learning-based network integration algorithm that incorporates recent advances in reasoning over unstructured data – namely the graph convolutional network (GCN) – and can effectively learn dependencies between any input network, such as those composed of protein-protein interactions, gene co-expression, or genetic interactions. Our method, BIONIC (**B**iological **N**etwork **I**ntegration using **C**onvolutions), learns features which contain substantially more functional information compared to existing approaches, linking genes that share diverse functional relationships, including co-complex and shared bioprocess annotation. BIONIC is scalable in both size and quantity of the input networks, making it feasible to integrate numerous networks on the scale of the human genome.

67  
68  
69  
70  
71  
72  
73  
74  
75  
76  
77  
78  
79  
80

## Introduction

High-throughput genomics projects produce massive amounts of biological data for thousands of genes. The results of these experiments can be represented as functional gene-gene interaction networks, which link genes or proteins of similar function<sup>1</sup>. For example, protein-protein interactions describe transient or stable physical binding events between proteins<sup>2-7</sup>. Gene co-expression profiles identify genes that share similar patterns of gene expression across multiple experimental conditions, revealing co-regulatory relationships between genes<sup>8,9</sup>. Genetic interactions (e.g. synthetic lethal) link genes that share an unexpected phenotype when perturbed simultaneously, capturing functional dependencies between genes<sup>10,11</sup>. Each of these data typically measures a specific aspect of gene function and have varying rates of false-positives and negatives. Data integration has the potential to generate more accurate and more complete functional networks. However, the diversity of experimental methods and results makes unifying and collectively interpreting this information a major challenge.

81  
82  
83  
84  
85  
86  
87  
88  
89  
90

Numerous methods for network integration have been developed with a range of benefits and disadvantages. For example, many integration algorithms produce networks that retain only global topological features of the original networks, at the expense of important local relationships<sup>12-15</sup>, while others fail to effectively integrate networks with partially disjoint node sets<sup>16,17</sup>. Some methods encode too much noise in their output, for instance by using more dimensions than necessary to represent their output, thereby reducing downstream gene function and functional interaction prediction quality<sup>12-16</sup>. Most of these approaches do not scale in the number of networks or in the size of the networks to real world settings<sup>14,16,18</sup>. Supervised methods have traditionally been the most common network integration approach<sup>15,18-20</sup>. These

91 methods, while highly successful, require labelled training data to optimize their predictions of  
92 known gene functions, and thus risk being biased by and limited to working with known  
93 functional descriptions.

94

95 Unsupervised methods have more recently been explored to address this potential weakness.  
96 They automatically identify network structure, such as modules, shared across independent  
97 input data and can function in an unbiased manner, using techniques such as matrix  
98 factorization<sup>12-14</sup>, cross-diffusion<sup>16</sup>, low-dimensional diffusion state approximation<sup>17</sup> and  
99 multimodal autoencoding<sup>21</sup>. Theoretically, unsupervised network integration methods can  
100 provide a number of desirable features such as automatically retaining high-quality gene  
101 relationships and removing spurious ones, inferring new relationships based on the shared  
102 topological features of many networks in aggregate, and outputting comprehensive results that  
103 cover the entire space of information associated with the input data, all while remaining agnostic  
104 to any particular view of biological function.

105

106 Recently, new methods have been developed that focus on learning compact features over  
107 networks<sup>22,23</sup>. These strategies aim to capture the global topological roles of nodes (i.e. genes or  
108 proteins) and reduce false positive relationships by compressing network-based node features  
109 to retain only the most salient information. However, this approach produces general purpose  
110 node features that cannot be tuned to capture the unique topology of any particular input  
111 network, which may vary greatly with respect to other input networks. Recent advances in deep  
112 learning have addressed this shortcoming with the development of the graph convolutional  
113 network (GCN), a general class of neural network architectures which are capable of learning  
114 features over networks<sup>24-27</sup>. GCNs can learn compact, denoised node features that are trainable  
115 in a network-specific fashion. Additionally, the modular nature of the GCN enables the easy  
116 addition of specialized neural network architectures to accomplish a task of interest, such as  
117 network integration, while remaining scalable to large input data. Compared to general-purpose  
118 node feature learning approaches<sup>22,23</sup>, GCNs have demonstrated substantially improved  
119 performance for a range of general network tasks, a direct result of their superior feature  
120 learning capabilities<sup>24,27</sup>. These promising developments motivate the use of the GCN for gene  
121 and protein feature learning on real-world, biological networks, which are large and numerous,  
122 and feature widely variable network topologies.

123

124 Here we present a general, scalable deep learning framework for network integration called  
125 BIONIC (**B**iological **N**etwork Integration using **C**onvolutions) which uses GCNs to learn holistic  
126 gene features given many different input networks. To demonstrate the utility of BIONIC, we  
127 integrate three diverse, high-quality gene or protein interaction networks to obtain integrated  
128 gene features that we compare to a range of function prediction benchmarks. We compare our  
129 findings to those obtained from a wide range of integration methodologies<sup>12,17</sup>, and we show that  
130 BIONIC features perform well at both capturing functional information, and scaling in the  
131 number of networks and network size, while maintaining gene feature quality.

132

133

134

135  
136  
137  
138  
139  
140  
141  
142  
143  
144  
145  
146  
147  
148  
149  
150  
151  
152  
153  
154  
155  
156  
157  
158  
159  
160

## Results

### *Method overview*

BIONIC uses the GCN neural network architecture to learn optimal gene (protein) interaction network features individually, and combines these features into a single, unified representation for each gene (**Fig. 1**). First, the input data, if not already in a network format, are converted to networks (e.g. by gene expression profile correlation). Each input network is then run through an independent GCN to produce network-specific gene features. Using an independent GCN for each network enables BIONIC to learn the parameters that capture unique input network features. Each input network is passed through its corresponding GCN multiple times (two times in our experiments - see **Methods**) to capture higher-order gene neighborhood information<sup>24</sup> and, with the addition of residual connections, BIONIC produces both local and global gene features<sup>28</sup>. The network-specific features are then summed through a stochastic gene dropout procedure to produce unified gene features which can be used in downstream tasks, such as functional module detection or gene function prediction. To optimize the functional information encoded in its integrated features, BIONIC must have a relevant training objective that facilitates capturing salient features across multiple networks. Here, BIONIC uses an autoencoder design and reconstructs each input network by mapping the integrated features to a network representation (decoding) and minimizing the difference between this reconstruction and the original input networks. By optimizing the fidelity of the network reconstruction, BIONIC forces the learned gene features to encode as much salient topological information present in the input networks as possible and reduces the amount of spurious information encoded. Indeed, in many cases, inputting even individual networks into BIONIC improves their performance on several benchmarks (below) compared to their original raw format (**Fig. S1**).

Few biological networks are comprehensive in terms of genome coverage and the overlap in the set of genes captured by different networks is often limited. Some methods ignore this problem by simply integrating genes that are common to all networks<sup>16</sup>, resulting in progressively smaller gene sets as more networks are added, whereas others unintentionally produce gene features that are dependent on whether a gene is present in all or only some of the input networks<sup>17</sup>. Integration methods generally require each input network to have the same set of genes, so to produce an integrated result that encompasses genes present across all networks (i.e. the union of genes) each network must be extended with any missing genes<sup>12,15-17,21</sup>. However, existing methods do not distinguish between genes that have zero interactions due to this extension or genes with zero measured interactions in the original data<sup>12,15-17</sup>. To address this, BIONIC implements a masking procedure which prevents penalizing the reconstruction fidelity of gene interaction profiles in networks where the genes were not originally present (see **Methods**).

### *Evaluation criteria*

We compared the quality of BIONIC's learned features to two established unsupervised integration methods, a matrix factorization method<sup>12</sup> and a diffusion state approximation method<sup>17</sup>, as well as a naive union of networks as a baseline. We assessed the quality of these

174  
175  
176  
177  
178

179 method outputs using three evaluation criteria: gene co-annotation precision-recall, gene  
180 module detection, and supervised gene function prediction. First, we used an established  
181 precision-recall evaluation strategy<sup>11,29</sup> to compare pairwise gene-gene relationships produced  
182 by the given method to sets of known positive and negative relationships (co-annotations).  
183 Second, we evaluated the capacity of each method to produce biological modules by comparing  
184 clusters computed from the output of each method to known modules such as protein  
185 complexes, pathways, and biological processes. Finally, the supervised gene function prediction  
186 evaluation determines how discriminative the method outputs are for predicting known gene  
187 functions. Here, a portion of the genes were held out and used to evaluate the accuracy of a  
188 support vector machine classifier<sup>30</sup> trained on the remaining gene features to predict known  
189 functional classes<sup>17</sup>.

190

### 191 *BIONIC produces high quality gene features*

192 We first used BIONIC to integrate three high-quality yeast networks: a comprehensive network  
193 of correlated genetic interaction profiles (4,529 genes, 33,056 interactions)<sup>11</sup>, a co-expression  
194 network derived from transcript profiles of yeast strains carrying deletions of transcription factors  
195 (1,101 genes, 14,826 interactions)<sup>9</sup>, and a protein-protein interaction network obtained from an  
196 affinity-purification mass-spectrometry assay (2,674 genes, 7,075 interactions)<sup>5</sup>, which combine  
197 for a total of 5,232 unique genes and 53,351 unique interactions (**Fig. 2, Supplementary Data**  
198 **File 1**).

199

200 We compared BIONIC integrated features to a naive union of networks integration approach  
201 (Union), a non-negative matrix tri-factorization approach (iCell)<sup>12</sup>, and a low-dimensional  
202 diffusion state approximation approach (Mashup)<sup>17</sup>. These unsupervised integration methods  
203 cover a diverse set of methodologies and the major possible output types (networks for Union  
204 and iCell, features for Mashup). Compared to these approaches, BIONIC integrated features  
205 have superior performance on all evaluation criteria over three different functional benchmarks:  
206 IntAct protein complexes<sup>31</sup>, Kyoto Encyclopedia of Genes and Genomes (KEGG) pathways<sup>32</sup>  
207 and Gene Ontology biological processes (GO)<sup>33</sup> (**Fig. 2a, Supplementary Data File 2**). As an  
208 additional test, BIONIC produces high-quality features that accurately predict a diverse set of  
209 yeast biological process annotations per gene<sup>11</sup> (**Fig. 2b**). Some categories in this latter test do  
210 better than others. These performance patterns were mirrored in the individual input networks  
211 (**Fig. S2**), indicating that this is the result of data quality, rather than method bias. Thus, BIONIC  
212 can capture high-quality functional information across diverse input networks, network  
213 topologies and gene function categories, and its features can be used to accurately identify  
214 pairwise gene co-annotation relationships, functional modules, and predict gene function.

215

216 Applying our benchmark-optimized module detection analysis to the individual input networks,  
217 we observed that features obtained through BIONIC network integration often outperformed the  
218 individual input networks at capturing functional modules (**Fig. S1**) and captured more modules  
219 (**Fig. 2c, Supplementary Data File 3**), demonstrating the utility of the combined features over  
220 individual networks for downstream applications such as module detection. Here we treated the  
221 network adjacency profiles (rows in the adjacency matrix) as gene features. We then examined  
222 how effectively the input networks and integrated BIONIC features captured known protein



223 complexes, by matching each individual known complex to its best matching predicted module  
224 and quantifying the overlap (**Fig. 2c**). We then compared the overlap scores from each network  
225 to the BIONIC overlap scores to identify complexes where BIONIC performs either better or  
226 worse than the input networks. Of 330 protein complexes tested, BIONIC strictly improved 204,  
227 292, 171 complex predictions and strictly worsened 103, 27, 128 complex predictions compared  
228 to the input protein-protein interaction, co-expression, and genetic interaction networks,  
229 respectively. The distributions of complex overlap scores for each dataset indicate that BIONIC  
230 predicts protein complexes more accurately than the input networks on average. Indeed, if we  
231 use an overlap score of 0.5 or greater to indicate a successfully captured complex, BIONIC  
232 captures 96 complexes, compared to 81, 3 and 72 complexes for the protein-protein interaction,  
233 co-expression, and genetic interaction networks, respectively (**Fig. 2c**). We also repeated this  
234 module analysis, instead optimizing the clustering parameters on a per-module basis, an  
235 approach that tests how well each network and BIONIC perform at capturing modules under  
236 optimal clustering conditions for each module. Here too, BIONIC captured more modules and  
237 with a greater average overlap score than the input networks (**Fig. S3, S4, Supplementary**  
238 **Data File 4**).

239  
240 To understand how BIONIC is able to improve functional gene module detection compared to  
241 the input networks, we examined the SEC62-SEC63 complex, which was identified in our  
242 benchmark-optimized module evaluation (**Fig. 2a**) as an example to show how BIONIC  
243 effectively combines gene-gene relationships across different networks and recapitulates known  
244 biology. The SEC62-SEC63 complex is an essential protein complex required for post-  
245 translational protein targeting to the endoplasmic reticulum and is made up of the protein  
246 products of four genes - SEC62, SEC63, SEC66, and SEC72<sup>34</sup>. We found that the cluster which  
247 best matched the SEC62-SEC63 complex in each input network only captured a subset of the  
248 full complex, or captured many additional members not known to be SEC62-SEC63 members  
249 (**Supplementary Data File 3**). The BIONIC module, however, contained the four known  
250 subunits of the SEC62-SEC63 complex, along with one member of the translocation complex,  
251 which shares a closely related function to the SEC62-SEC63 complex. We examined the best-  
252 matching clusters and their local neighborhood, consisting of genes that show a direct  
253 interaction with predicted members of the SEC62-SEC63 complex, in the input networks, and in  
254 a profile similarity network obtained from the integrated BIONIC features of these networks (**Fig.**  
255 **2d**). We found that the PPI network captured two members of the SEC62-SEC63 complex, with  
256 an additional member in the local neighborhood. Interactions between members of the complex  
257 are sparse however, preventing the clustering algorithm from identifying the full complex. The  
258 co-expression network only identified one complex member, and the local neighborhood of the  
259 best matching module does not contain any additional known complex members. The genetic  
260 interaction network is able to connect and localize all members of the SEC62-SEC63 complex,  
261 though the presence of three additional predicted complex members obscures the true complex.  
262 Finally, BIONIC utilizes the interaction information present in the PPI and genetic interaction  
263 networks to fully identify the SEC62-SEC63 module, with only one additional predicted complex  
264 member. This analysis demonstrates the utility of BIONIC for identifying meaningful biological  
265 modules in sparse networks and noisy networks by clustering its learned features. Indeed, when  
266 we optimized the module detection procedure to specifically resolve the SEC62-SEC63

267 complex, we found that BIONIC was able to capture the complex with a higher overlap score  
268 than any of the input networks and other integration methods (**Supplementary Data File 4**).

269

270

271 *BIONIC is scalable in number of networks and number of genes*

272 High-throughput experiments have led to a rapidly growing wealth of biological networks. For  
273 the major studied organisms, including yeast and human, there are hundreds of available  
274 networks which, when unified, often include close to a genome-wide set of genes. Ideally, all of  
275 these networks could be unified to improve available gene function descriptions. However,  
276 many unsupervised integration methods either cannot run with many input networks or networks  
277 with large numbers of genes, or they scale with reduced performance. To test network input  
278 scalability, we randomly sampled progressively larger sets of yeast gene co-expression  
279 networks (**Fig. 3a, Supplementary Data File 1**) and assessed the performance of the resulting  
280 integrations of these sets. We similarly tested node scalability by randomly subsampling  
281 progressively larger gene sets of four human protein-protein interaction networks<sup>3,6,7,35</sup> (**Fig. 3b,**  
282 **Supplementary Data File 1**). BIONIC can integrate numerous networks (**Fig. 3a**), as well as  
283 networks with many nodes (**Fig. 3b**), outperforming all other methods assessed for  
284 progressively more and larger networks. To achieve this scalability, BIONIC takes advantage of  
285 the versatile nature of deep learning technology by learning features for small batches of genes  
286 and networks at a time, reducing the computational resources required for any specific training  
287 step. To learn gene features over large networks, BIONIC learns features for random subsets of  
288 genes at each training step, and randomly subsamples the local neighborhoods of these genes  
289 to perform the graph convolution (see **Methods**), maintaining a small overall computational  
290 footprint. This subsampling allows BIONIC to integrate networks with many genes, whereas  
291 methods like Mashup can only do so with an approximate algorithm which substantially reduces  
292 performance (**Fig. S5**). To integrate many networks, BIONIC uses a network-wise sampling  
293 approach, where a random subset of networks is integrated at a time during each training step.  
294 This reduces the number of parameter updates required at once, since only GCNs  
295 corresponding to the subsampled networks are updated in a given training step.

296

297

## Discussion

298

299 We present BIONIC, a new deep-learning algorithm that extends the graph convolutional  
300 network architecture to integrate biological networks. We demonstrated that BIONIC produces  
301 gene features which capture functional information well when compared to other unsupervised  
302 methods<sup>12,17</sup> as determined by a range of benchmarks and evaluation criteria, covering a  
303 diverse set of downstream applications such as gene co-annotation prediction, functional  
304 module detection and gene function prediction. We have also shown that BIONIC performs well  
305 for a range of numbers of input networks and network sizes, where established methods are not  
306 able to scale past relatively few networks or scale only with reduced performance.

307

308 In a global sense, BIONIC performs well and captures relevant functional information across  
309 input networks. However, input networks do not have uniform quality and some networks may  
310 only describe certain types of functional relationships effectively (such as those within a

311 particular biological process) while obscuring other relationships. Indeed, while BIONIC is able  
312 to capture a greater number of functional modules than a given input network alone (**Fig. 2c,**  
313 **Fig. S3**), BIONIC does not capture every functional module present in the input networks (**Fig.**  
314 **2c, Fig. S4, Supplementary Data Files 3, 4**). This is likely due to some networks obscuring  
315 signals present in other networks. Implementing more advanced input network feature weighting  
316 or learning these weightings should ensure that high-quality information is preferentially  
317 encoded in the learned features and that low-quality information is not enriched. This may  
318 additionally help to identify which functional relationships are driven by which networks and  
319 network types - indicating which parts of the functional spectrum have good or poor coverage  
320 and identifying areas to target for future experimental work.

321  
322 Interestingly, the naive union of networks approach performs surprisingly well, motivating its  
323 inclusion as a baseline in our network integration algorithm assessments. While the union  
324 network contains all possible relationships across networks, it likely contains relatively more  
325 false-positive relationships in the integrated result, since all false-positives in the input networks  
326 are retained by the union operation.

327  
328 Finally, BIONIC learns gene features based solely on their topological role in the given  
329 networks. GCN's are able to incorporate *a priori* node features. A powerful future addition to  
330 BIONIC would be to include gene or protein features such as amino acid sequence<sup>36</sup>, protein  
331 localization<sup>37</sup>, morphological defect<sup>38</sup>, or other non-network features to provide additional  
332 context for genes in addition to their topological role. Continued development of integrative gene  
333 function prediction using deep learning-based GCN and encoder-decoder technologies will  
334 enable us to map gene function more richly and at larger scales than previously possible.

335  
336  
337

## Bibliography

- 338 1. Fraser, A. G. & Marcotte, E. M. A probabilistic view of gene function. *Nat. Genet.* **36**, 559  
339 (2004).
- 340 2. Yu, H. *et al.* High-Quality Binary Protein Interaction Map of the Yeast Interactome Network.  
341 *Science* **322**, 104 LP–110 (2008).
- 342 3. Rolland, T. *et al.* A Proteome-Scale Map of the Human Interactome Network. *Cell* **159**,  
343 1212–1226 (2014).
- 344 4. Gavin, A.-C. *et al.* Proteome survey reveals modularity of the yeast cell machinery. *Nature*  
345 **440**, 631 (2006).
- 346 5. Krogan, N. J. *et al.* Global landscape of protein complexes in the yeast *Saccharomyces*  
347 *cerevisiae*. *Nature* **440**, 637–643 (2006).



- 348 6. Huttlin, E. L. *et al.* The BioPlex Network: A Systematic Exploration of the Human  
349 Interactome. *Cell* **162**, 425–440 (2015).
- 350 7. Hein, M. Y. *et al.* A Human Interactome in Three Quantitative Dimensions Organized by  
351 Stoichiometries and Abundances. *Cell* **163**, 712–723 (2015).
- 352 8. Hibbs, M. A. *et al.* Exploring the functional landscape of gene expression: directed search  
353 of large microarray compendia. *Bioinformatics* **23**, 2692–2699 (2007).
- 354 9. Hu, Z., Killion, P. J. & Iyer, V. R. Genetic reconstruction of a functional transcriptional  
355 regulatory network. *Nat. Genet.* **39**, 683–687 (2007).
- 356 10. Costanzo, M. *et al.* The Genetic Landscape of a Cell. *Science* **327**, 425 LP–431 (2010).
- 357 11. Costanzo, M. *et al.* A global genetic interaction network maps a wiring diagram of cellular  
358 function. *Science* **353**, (2016).
- 359 12. Malod-Dognin, N. *et al.* Towards a data-integrated cell. *Nat. Commun.* **10**, 805 (2019).
- 360 13. Wang, P., Gao, L., Hu, Y. & Li, F. Feature related multi-view nonnegative matrix  
361 factorization for identifying conserved functional modules in multiple biological networks.  
362 *BMC Bioinformatics* **19**, 394 (2018).
- 363 14. Argelaguet, R. *et al.* Multi-Omics Factor Analysis—a framework for unsupervised  
364 integration of multi-omics data sets. *Mol. Syst. Biol.* **14**, e8124 (2018).
- 365 15. Mostafavi, S., Ray, D., Warde-Farley, D., Grouios, C. & Morris, Q. GeneMANIA: a real-time  
366 multiple association network integration algorithm for predicting gene function. *Genome*  
367 *Biol.* **9**, S4–S4 (2008).
- 368 16. Wang, B. *et al.* Similarity network fusion for aggregating data types on a genomic scale.  
369 *Nat. Methods* **11**, 333 (2014).
- 370 17. Cho, H. *et al.* Compact Integration of Multi-Network Topology for Functional Analysis of  
371 Genes. *Cell systems* **3**, 540–548.e5 (2016).
- 372 18. Huttenhower, C., Hibbs, M., Myers, C. & Troyanskaya, O. G. A scalable method for  
373 integration and functional analysis of multiple microarray datasets. *Bioinformatics* **22**, 2890–

- 374 2897 (2006).
- 375 19. von Mering, C. *et al.* STRING: a database of predicted functional associations between  
376 proteins. *Nucleic Acids Res.* **31**, (2003).
- 377 20. Alexeyenko, A. & Sonnhammer, E. L. L. Global networks of functional coupling in  
378 eukaryotes from comprehensive data integration. *Genome Res.* **19**, 1107–1116 (2009).
- 379 21. Gligorijević, V., Barot, M. & Bonneau, R. deepNF: Deep network fusion for protein function  
380 prediction. *bioRxiv* (2017).
- 381 22. Perozzi, B., Al-Rfou, R. & Skiena, S. DeepWalk: Online Learning of Social Representations.  
382 (2014) doi:10.1145/2623330.2623732.
- 383 23. Grover, A. & Leskovec, J. node2vec: Scalable Feature Learning for Networks. (2016).
- 384 24. Kipf, T. N. & Welling, M. Semi-Supervised Classification with Graph Convolutional  
385 Networks. (2016).
- 386 25. Defferrard, M., Bresson, X. & Vandergheynst, P. Convolutional Neural Networks on Graphs  
387 with Fast Localized Spectral Filtering. (2016).
- 388 26. Hamilton, W. L., Ying, R. & Leskovec, J. Inductive Representation Learning on Large  
389 Graphs. (2017).
- 390 27. Veličković, P. *et al.* Graph Attention Networks. (2017).
- 391 28. Huang, B. & Carley, K. M. Residual or Gate? Towards Deeper Graph Neural Networks for  
392 Inductive Graph Representation Learning. *arXiv [cs.LG]* (2019).
- 393 29. Myers, C. L. *et al.* Discovery of biological networks from diverse functional genomic data.  
394 *Genome Biol.* **6**, R114 (2005).
- 395 30. Cortes, C. & Vapnik, V. Support-Vector Networks. *Mach. Learn.* **20**, 273–297 (1995).
- 396 31. Orchard, S. *et al.* The MIntAct project--IntAct as a common curation platform for 11  
397 molecular interaction databases. *Nucleic Acids Res.* **42**, D358–63 (2014).
- 398 32. Kanehisa, M. & Goto, S. KEGG: Kyoto Encyclopedia of Genes and Genomes. *Nucleic  
399 Acids Res.* **28**, 27–30 (2000).

- 400 33. Ashburner, M. *et al.* Gene ontology: tool for the unification of biology. The Gene Ontology  
401 Consortium. *Nat. Genet.* **25**, 25–29 (2000).
- 402 34. Deshaies, R. J., Sanders, S. L., Feldheim, D. A. & Schekman, R. Assembly of yeast Sec  
403 proteins involved in translocation into the endoplasmic reticulum into a membrane-bound  
404 multisubunit complex. *Nature* **349**, 806–808 (1991).
- 405 35. Huttlin, E. L. *et al.* Architecture of the human interactome defines protein communities and  
406 disease networks. *Nature* **545**, 505 (2017).
- 407 36. Elnaggar, A. *et al.* ProtTrans: Towards Cracking the Language of Life’s Code Through Self-  
408 Supervised Deep Learning and High Performance Computing. *bioRxiv* 2020.07.12.199554  
409 (2020) doi:10.1101/2020.07.12.199554.
- 410 37. Almagro Armenteros, J. J., Sønderby, C. K., Sønderby, S. K., Nielsen, H. & Winther, O.  
411 DeepLoc: prediction of protein subcellular localization using deep learning. *Bioinformatics*  
412 **33**, 3387–3395 (2017).
- 413 38. Mattiazzi Usaj, M. *et al.* Systematic genetics and single-cell imaging reveal widespread  
414 morphological pleiotropy and cell-to-cell variability. *Mol. Syst. Biol.* **16**, 30 (2020).
- 415 39. Stark, C. *et al.* BioGRID: a general repository for interaction datasets. *Nucleic Acids Res.*  
416 **34**, D535–D539 (2006).
- 417 40. Myers, C. L., Barrett, D. R., Hibbs, M. A., Huttenhower, C. & Troyanskaya, O. G. Finding  
418 function: evaluation methods for functional genomic data. *BMC Genomics* **7**, 187 (2006).
- 419 41. Aggarwal, C. C., Hinneburg, A. & Keim, D. A. On the Surprising Behavior of Distance  
420 Metrics in High Dimensional Space. in *Database Theory — ICDT 2001* 420–434 (Springer  
421 Berlin Heidelberg, 2001).
- 422 42. Davis, J. & Goadrich, M. The relationship between Precision-Recall and ROC curves. BT -  
423 Proceedings of the 23rd International Conference on Machine Learning: June 25-29, 2006;  
424 Pittsburgh, Pennsylvania. in (eds. Cohen, W. W. & Moore, A.) (ACM Press, 2006).
- 425 43. Shannon, P. *et al.* Cytoscape: a software environment for integrated models of

- 426        biomolecular interaction networks. *Genome Res.* **13**, 2498–2504 (2003).
- 427    44. Paszke, A. *et al.* Automatic Differentiation in PyTorch. in *NIPS Autodiff Workshop* (2017).
- 428    45. Fey, M. & Lenssen, J. E. Fast Graph Representation Learning with PyTorch Geometric.
- 429        *arXiv [cs.LG]* (2019).
- 430    46. Kingma, D. P. & Ba, J. Adam: A Method for Stochastic Optimization. *arXiv [cs.LG]* (2014).

431  
432  
433

### Acknowledgements

434 We thank B. Andrews, M. Costanzo and C. Myers for their insightful comments. We also thank  
435 M. Fey for adding important features to the Pytorch Geometric library for us. This work was  
436 supported by NRNB (U.S. National Institutes of Health, National Center for Research Resources  
437 grant number P41 GM103504). Funding for continued development and maintenance of  
438 Cytoscape is provided by the U.S. National Human Genome Research Institute (NHGRI) under  
439 award number HG009979. This work was also supported by CIHR (Canadian Institutes of  
440 Health Research) Foundation grant number FDN-143264, US National Institutes of Health grant  
441 number R01HG005853 and joint funding by Genome Canada (OGI-163) and the Ministry of  
442 Economic Development, Job Creation and Trade, under the program Bioinformatics and  
443 Computational Biology (BCB).

444  
445  
446

### Author Contributions

447 DTF developed the method, performed the experiments. DTF, CB, GDB and BW wrote the  
448 manuscript. CB, GDB and BW conceived of and supervised the project.

449  
450  
451

### Competing Interests

452 The authors declare no competing interests.

453  
454  
455

### Online Methods

456  
457

#### *Network Preprocessing*

458 The yeast protein-protein interaction network<sup>5</sup> and human protein-protein interaction  
459 networks<sup>3,6,7,35</sup> were obtained from BioGRID<sup>39</sup>, genetic interaction profiles<sup>11</sup> were obtained  
460 directly from the published supplementary data of Costanzo *et al.* 2016, and gene expression  
461 profiles were obtained from the SPELL database<sup>8</sup>. To create a network from the genetic  
462 interaction profiles, genes with multiple alleles were collapsed into a single profile by taking the  
463 maximum profile values across allele profiles. Pairwise Pearson correlation between the profiles  
464 was then calculated, and gene pairs with a correlation magnitude greater than or equal to 0.2  
465 were retained as edges, as established<sup>11</sup>. For the gene expression profiles, networks were

466 constructed by retaining gene pairs with a profile Pearson correlation magnitude in the 99.5th  
467 percentile. Co-expression and genetic interaction networks had their edge weights normalized  
468 to the range [0, 1].

469

### 470 *Obtaining Integrated Results*

471 The naive union of networks benchmark was created by taking the union of node sets and edge  
472 sets across input networks. For edges common to more than one network, the maximum weight  
473 was used. iCell results were obtained by running the algorithm with default parameters. Mashup  
474 and BIONIC were set to have the same dimensionality (512 for all experiments). All other  
475 Mashup parameters were defaults. For human networks, an SVD approximation feature of  
476 BIONIC was used (see **Implementation Details** below) to compute low-dimensional initial node  
477 features and preserve memory. BIONIC features used in this study are found in  
478 **Supplementary Data File 5**.

479

### 480 *Benchmark Construction*

481 Functional benchmarks were derived from GO Biological Process ontology annotations, KEGG  
482 pathways and IntAct complexes for yeast, and CORUM complexes for human (**Supplementary**  
483 **Data File 2**). Analyses were performed using positive and negative gene pairs, clusters or  
484 functional labels obtained from the standards as follows: the GO Biological Process benchmark  
485 was produced by filtering IEA annotations, as they are known to be lower quality, removing  
486 genes with dubious open reading frames, and filtering terms with more than 30 annotations (to  
487 prevent large terms, such as those related to ribosome biogenesis, from dominating the  
488 analysis<sup>40</sup>). For the co-annotation benchmark, all gene pairs sharing at least one annotation  
489 were retained as positive pairs, while all gene pairs not sharing an annotation were considered  
490 to be negative pairs. KEGG, IntAct and CORUM benchmarks were produced analogously,  
491 without filtering.

492

493 For the module detection benchmark, clusters were defined as the set of genes annotated to a  
494 particular term, for each standard. Modules of size 1 (singletons) were removed from the  
495 resulting module sets as they are uninformative.

496

497 The supervised standards were obtained by treating each gene annotation as a class label,  
498 leading to genes with multiple functional classes (i.e. a multilabel classification problem). The  
499 standards were filtered to only include classes with 20 or more members for GO Biological  
500 Process and KEGG, or 10 members for IntAct. This was done to remove classes with very few  
501 data points, ensuring more robust evaluations.

502

503 The granular function standard in **Fig. 2b** was obtained from the Costanzo et al. 2016  
504 supplementary materials. Any functional category with fewer than 20 gene members was  
505 removed from the analysis to ensure only categories with robust evaluations were reported.

506

### 507 *Evaluation Methods*

508 We used a precision-recall (PR) based co-annotation framework to evaluate individual networks  
509 and integrated results. We used PR instead of receiving operator curve (ROC) because of the



510 substantial imbalance of positives and negatives in the pairwise benchmarks for which ROC  
511 would overestimate performance. Here, we computed the pairwise cosine similarities between  
512 gene profiles in each network or integration result. Due to the high-dimensionality of the  
513 datasets, cosine similarity is a more appropriate measure than Euclidean distance since the  
514 contrast between data points is reduced in high-dimensional spaces under Euclidean distance<sup>41</sup>.  
515 PR operator points were computed by varying a similarity threshold, above which gene or  
516 protein pairs are considered positives and below which pairs are considered negative. Each set  
517 of positive and negative pairs was compared to the given benchmark to compute precision and  
518 recall values. To summarize the PR curve into a single metric, we computed average precision  
519 (AP) given by:

520

$$AP = \sum_{i=1}^n (R_i - R_{i-1})P_i$$

521 (1)

522 where  $n$  is the number of operator points (i.e. similarity thresholds) and  $P_i$  and  $R_i$  are the  
523 precision and recall values at operator point  $i$  respectively. This gives the average of precision  
524 values weighted by their corresponding improvements in recall. We chose this measure over the  
525 closely related area under the PR curve (AUPRC) measure since AUPRC interpolates between  
526 operator points and tends to overestimate actual performance<sup>42</sup>.

527

528 The module detection evaluation was performed by clustering the integrated results from each  
529 method and comparing the coherency of resulting clusters with the module-based benchmarks.  
530 Since the benchmarks contain overlapping modules (i.e. one gene can be present in more than  
531 one module) which prevents the use of many common clustering evaluation metrics (since  
532 these metrics assume unique assignment of gene to cluster), the module sets are subsampled  
533 during the evaluation to ensure there are no overlapping modules (the original module sets are  
534 used as-is for the per-module-optimized experiments in **Fig. S4, Supplementary Data File 3**).  
535 Next, the integrated results are hierarchically clustered with a range of distance metrics  
536 (Euclidean and cosine), linkage methods (single, average and complete) and thresholds to  
537 optimize benchmark comparisons over these clustering parameters (this is done for all methods  
538 that are compared). The resulting benchmark-optimized cluster sets are compared to the  
539 benchmark module sets by computing adjusted mutual information (AMI) - an information  
540 theoretic comparison measure which is adjusted to normalize against the expected score from  
541 random clustering. The highest AMI score for each integration approach is reported - ensuring  
542 the optimal cluster set for each dataset across clustering parameters is used for the comparison  
543 and that our results are not dependent on clustering parameters. Finally, this procedure is  
544 repeated ten times to control for differences in scores due to the cluster sampling procedure.  
545 The sets of clustering parameter-optimized BIONIC clusters obtained from the **Fig. 2** integration  
546 for each standard are in **Supplementary Data File 3**.

547

548 To perform the supervised gene function prediction evaluation, ten trials of five-fold cross  
549 validation were performed using support vector machine (SVM) classifiers each using a radial  
550 basis function kernel<sup>30</sup>. The classifiers were trained on a set of gene features obtained from the

551 given integration method with corresponding labels given by the IntAct, KEGG and GO  
552 Biological Process supervised benchmarks in a one-versus-all fashion (since each individual  
553 gene has multiple labels). Each classifier's regularization and gamma parameters were tuned in  
554 the validation step. For each trial, the classifier results were evaluated on a randomized held out  
555 set consisting of 10% of the gene features not seen during training or validation and the  
556 resulting classification accuracy was reported.

557  
558 The granular functional evaluation in **Fig. 2b** was generated by computing the average precision  
559 (as mentioned in the precision-recall evaluation framework description) for the gene subsets  
560 annotated to the given functional categories.

561  
562 To perform the module comparison analysis in **Fig. 2c**, we additionally applied the module  
563 detection analysis performed in **Fig. 2a** to the input networks. Here, the interaction profiles of  
564 the networks were treated as gene features and the clustering parameters were optimized to  
565 best match the IntAct complexes standard. We compared the resulting module sets from the  
566 input networks and BIONIC features to known protein complexes given by the IntAct standard.  
567 For each complex in the standard, we reported the best matching predicted module in each  
568 dataset as determined by the overlap (Jaccard) score between the module and the known  
569 complex (**Supplementary Data File 3**). To generate the Venn diagram, we defined a complex  
570 to have been captured in the dataset if it had an overlap score of 0.5 or greater with a predicted  
571 module.

572  
573 To perform the SEC62-SEC63 module analysis in **Fig. 2d**, we analyzed the predicted module in  
574 each dataset that had the highest overlap score with the SEC62-SEC63 complex. We created a  
575 network from the BIONIC features by computing the cosine similarity between all pairs of genes  
576 and setting all similarities below 0.5 to zero. The resulting non-zero values were then treated as  
577 weighted edges to form a network. We extracted a subnetwork from each of the protein-protein  
578 interaction, co-expression, genetic interaction and newly created BIONIC networks, consisting  
579 of the best scoring predicted module and the genes showing direct interactions with those in the  
580 predicted module. We laid out these networks using the prefuse force-directed algorithm in  
581 Cytoscape<sup>43</sup>. The edges in the protein-protein interaction network correspond to direct, physical  
582 interactions, and the edges in the co-expression and genetic interaction networks correspond to  
583 the pairwise Pearson correlation of the gene profiles, as described above.

#### 584 585 *Network Scaling Experiment*

586 To perform the network scaling experiment, we sampled subsets of the yeast co-expression  
587 networks (**Supplementary Data File 1**). We performed 10 integration trials for each network  
588 quantity, and these trials were paired (i.e. each method integrated the same randomly sampled  
589 sets of networks). The average precision scores of the resulting integrations with respect to the  
590 KEGG pathways co-annotation standard (**Supplementary Data Files 2**) were then reported.  
591 The Mashup method did not scale to the 15 network input size or beyond on a machine with  
592 64GB of RAM.

#### 593 594 *Node Scaling Experiment*

595 The node scaling experiment was performed by subsampling the nodes of four large human  
596 protein-protein interaction networks<sup>3,6,7,35</sup> (**Supplementary Data File 1**) for a range of node  
597 quantities and integrating these subsampled networks. Ten trials of subsampling were  
598 performed for each number of nodes (paired, as above) and the average precision scores with  
599 respect to the CORUM complexes co-annotation standard (**Supplementary Data File 2**) were  
600 reported. The Mashup method did not scale to 4000 nodes or beyond on a machine with 64GB  
601 of RAM.

602

### 603 *BIONIC Method Overview*

604 An undirected input network can be represented by its adjacency matrix  $A$  where  $A_{ij} = A_{ji} > 0$  if  
605 node  $i$  and node  $j$  share an edge and  $A_{ij} = A_{ji} = 0$  otherwise. BIONIC first preprocesses each  
606 input network to contain the union of nodes across all input networks and ensures the  
607 corresponding row and column orderings are the same. In instances where networks are  
608 extended to include additional nodes not originally present in them (so all input networks share  
609 the same union set of nodes), the rows and columns corresponding to these nodes are set to 0.

610

611 BIONIC encodes each input network using instances of a GCN variant known as the Graph  
612 Attention Network (GAT)<sup>27</sup>. The GAT has the ability to learn alternative network edge weights,  
613 allowing it to downweight or upweight edges based on their importance for the network  
614 reconstruction task. In the original formulation, the GAT assumes binary network inputs. We  
615 modify the GAT to consider *a priori* network edge weights. The GAT formulation is then given  
616 by:

617

$$GAT(A, H) = \sigma(\alpha HW^T) \quad (2)$$

618

619 where

620

$$\alpha_{ij} = \frac{A_{ij} \cdot \exp(\sigma(a^T [Wh_i || Wh_j]))}{\sum_{k=1} A_{ik} \cdot \exp(\sigma(a^T [Wh_i || Wh_k]))} \quad (3)$$

621

622 Here,  $W$  is a trainable weight matrix which projects aggregated node features into another  
623 feature space,  $a$  is a vector of trainable attention coefficients which determine the resulting edge  
624 weighting,  $h_i$  is the feature vector for node  $i$  (that is, the  $i$ th row of feature matrix  $H$ ),  $||$  denotes  
625 the concatenation operation and  $\sigma$  corresponds to a nonlinear function (in our case a leaky  
626 rectified linear unit (LeakyReLU)) which produces more sophisticated features than linear maps.  
627 (2) corresponds to a node neighborhood aggregation and projection step which incorporates an  
628 edge weighting scheme (3). In practice, several edge weighting schemes (known as attention  
629 heads) are learned and combined simultaneously, resulting in:

630

$$GAT(A, H) = ||_{k=1}^K \sigma(\alpha^{(k)} HW^{(k)T}) \quad (4)$$

631

632 where  $K$  is the number of attention heads. This is done to stabilize the attention learning  
 633 process, as per the author's original results<sup>27</sup>. In our experiments we use 10 attention heads per  
 634 GAT encoder, each with a hidden dimension of 64.

635  
 636 Initial node features  $H_{init}$  are a one-hot encoding so that each node is uniquely identified (i.e.  
 637  $H_{init} = I$  where  $I$  is the identity matrix). These features are first mapped to a lower dimensional  
 638 space through a learned linear transformation to reduce memory footprint and improve training  
 639 time. Due to the current technical limitations in how the underlying deep learning framework  
 640 handles sparse matrices, the GAT cannot handle a sparse representation of  $H_{init}$  as an input.  
 641 BIONIC encodes each network by passing it through a GAT several times to learn node  
 642 features based on higher-order neighborhoods. We use two sequential GAT passes in our  
 643 experiments, as we found this to give the best results while limiting computation time. After all  
 644 networks are separately encoded, the network-specific node features are combined through a  
 645 weighted, stochastically masked summation given by:

646

$$H_{combined} = \sum_{j=1}^N s_j m^{(j)} \odot H^{(j)}$$

647 (5)

648 Here,  $N$  is the number of input networks,  $s_j$  is the learned scaling coefficient for feature  
 649 representations of network  $j$ ,  $\odot$  is the element-wise product,  $H^{(j)}$  is the matrix of learned  
 650 feature vectors for nodes in network  $j$ , and  $m^{(j)}$  is the node-wise stochastic mask for network  $j$ ,  
 651 calculated as:

$$m_i^{(j)} = \begin{cases} 1, & \text{if node } i \text{ is unique to network } j \text{ or } m_i^{(k \neq j)} = 0 \\ 0, & \text{if node } i \text{ is not in unextended network } j \\ \frac{x}{\sum_{k=1}^N m_i^{(k)}}, x \sim \text{Bernoulli}(0.5), & \text{otherwise} \end{cases} \quad (6)$$

652

653 The mask  $m$  is designed to randomly drop node feature vectors produced from networks with  
 654 the constraint that a node cannot be masked from every network, and node features from nodes  
 655 not present in the original, unextended networks are dropped. This masking procedure forces  
 656 the network encoders to compensate for missing node features in other networks ensuring the  
 657 encoders learn cross-network dependencies and map their respective node features to the  
 658 same feature space. The network scaling vector  $s$  in (5) enables BIONIC to scale features in a  
 659 network-wise fashion, affording more flexibility in learning the optimal network-specific node  
 660 features for the combination step.  $s$  is learned with the constraint that its elements are positive  
 661 and sum to 1, ensuring BIONIC does not over- or negatively-scale the features.

662

663 To obtain the final, integrated node features  $F$ , BIONIC maps  $H_{combined}$  to a low dimensional  
 664 space through a learned linear transformation. In  $F$ , each column corresponds to a specific  
 665 learned feature and each row corresponds to a node. To obtain a high quality  $F$ , BIONIC  
 666 decodes  $F$  into reconstructions of the original input networks and minimizes the discrepancy  
 667 between the reconstructions and the inputs. The decoded network reconstruction is given by:

668

$$\hat{A} = F \cdot F^T$$

669

(7)

670 BIONIC trains by minimizing the following loss equation:

671

$$L = \frac{1}{n^2} \sum_{j=1}^N \|b^{(j)} \odot (\hat{A} - A^{(j)}) \odot b^{(j)T}\|_F^2$$

672

(8)

673 where  $n$  is the total number of nodes present in the union of networks,  $b^{(j)}$  is a binary mask  
674 vector for network  $j$  indicating which nodes are present (value of 1) or extended (value of 0) in  
675 the network,  $A^{(j)}$  is the adjacency matrix for network  $j$  and  $\|\cdot\|_F$  is the Frobenius norm. This  
676 loss represents computing the mean squared error between the reconstructed network  $\hat{A}$  and  
677 input  $A^{(j)}$  while the mask vectors remove the penalty for reconstructing nodes that are not in the  
678 original network  $j$  (i.e. extended), then summing the error for all networks.

679

#### 680 *Implementation Details*

681 BIONIC was implemented using PyTorch<sup>44</sup>, a popular Python-based deep learning framework  
682 and relies on functions and classes from the PyTorch Geometric library<sup>45</sup>. It uses the Adam<sup>46</sup>  
683 optimizer to train and update its weights. To be scalable in the number of networks, BIONIC  
684 utilizes a network batching approach where subsets of networks are sampled and integrated at  
685 each training step. The sampling procedure is designed so that each network is integrated  
686 exactly once per training step. Network batching yields a constant memory footprint at the  
687 expense of increased runtime with no empirical degradation of feature quality. In addition to this,  
688 BIONIC is also scalable in the number of network nodes. It uses a node sampling approach to  
689 learn features for subsets of nodes in a network, and a neighborhood sampling procedure to  
690 subsample node neighborhoods. Node sampling ensures only part of a network needs to be  
691 retained in memory at a time while neighborhood sampling reduces the effective higher order  
692 neighborhood size in sequential GAT passes, again reducing the number of nodes required to  
693 be retained in memory at any given time - further reducing BIONIC's memory footprint.

694

695 For very large networks where the initial node feature matrix (i.e. the identity matrix) cannot fit  
696 into memory due to limitations with PyTorch matrix operations, BIONIC incorporates a singular  
697 value decomposition (SVD) based approximation. First, the union of networks is computed by  
698 creating a network that contains the nodes and edges of all input networks. If an edge occurs in  
699 multiple networks, the maximum weight is used. A low-dimensional SVD approximation of  
700 normalized Laplacian matrix of the union network is computed and used as the initial node  
701 features for each network. Finally, BIONIC uses sparse representations of network adjacency  
702 matrices (except for the input node feature matrix, see above), further reducing memory  
703 footprint. All BIONIC experiments in this paper were run on an NVIDIA Titan X GPU with 12GB  
704 of VRAM, no more than 16GB of system RAM and a single CPU.

705



706 [Data Availability](#)

707 All data, standards and BIONIC yeast features are available at <https://data.wanglab.ml/BIONIC/>.

708

709 [Code Availability](#)

710 The BIONIC code is available at <https://github.com/bowang-lab/BIONIC>.

711

712

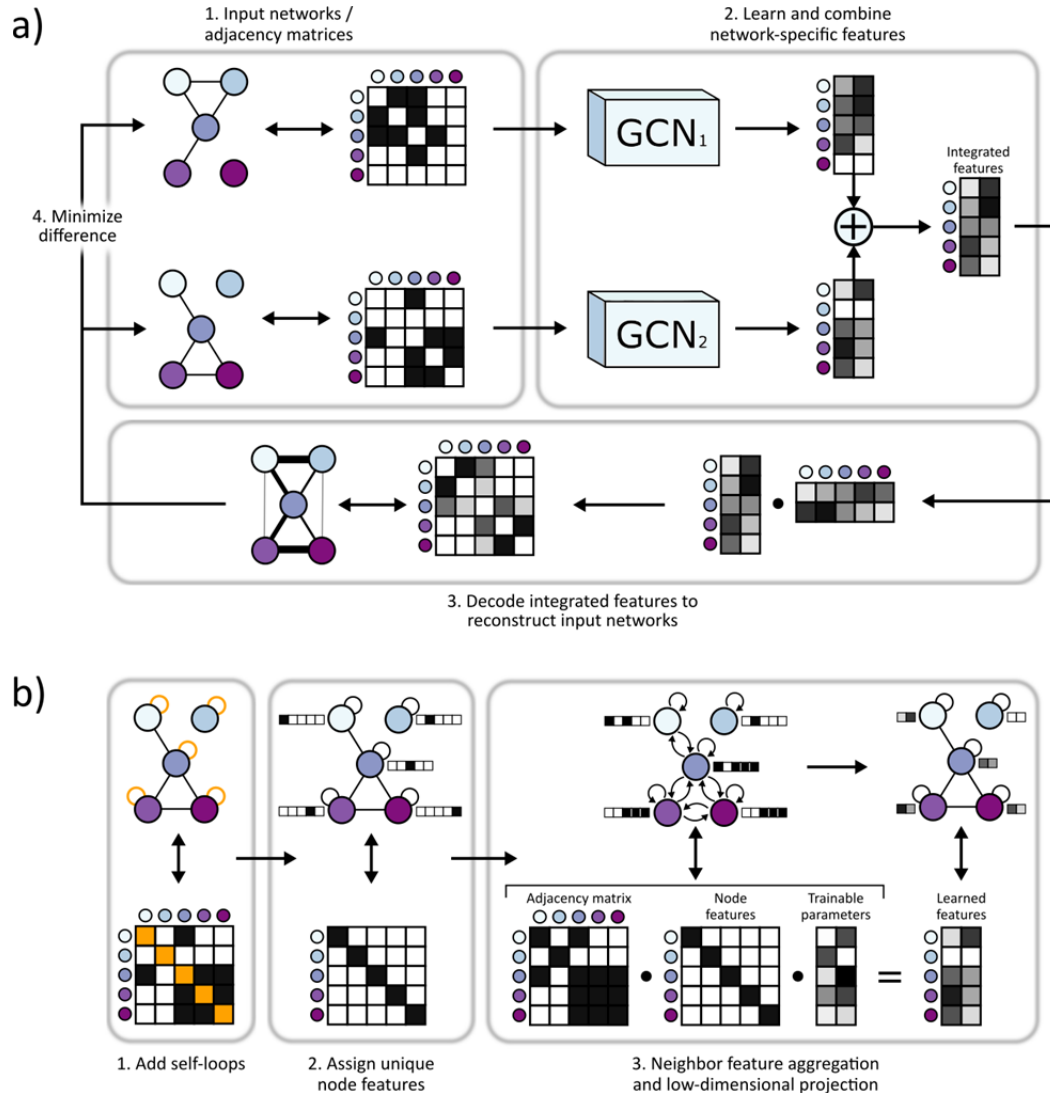

713

714

715 **Figure 1. a)** 1. Gene interaction networks input into BIONIC are represented as adjacency matrices. 2. Each network

716 is passed through a graph convolution network (GCN) to produce network-specific gene features which are then

717 combined into an integrated feature set which can be used for downstream tasks such as functional module

718 detection. 3. BIONIC attempts to reconstruct the input networks by decoding the integrated features through a dot

719 product operation. 4. BIONIC trains by updating its weights to reproduce the input networks as accurately as

720 possible. **b)** The GCN architecture functions by 1. adding self-loops to each network node, 2. assigning a “one-hot”

721 feature vector to each node in order for the GCN to uniquely identify nodes and 3. propagating node features along

722 edges followed by a low-dimensional, learned projection to obtain updated node features which encode network

723 topology.

724



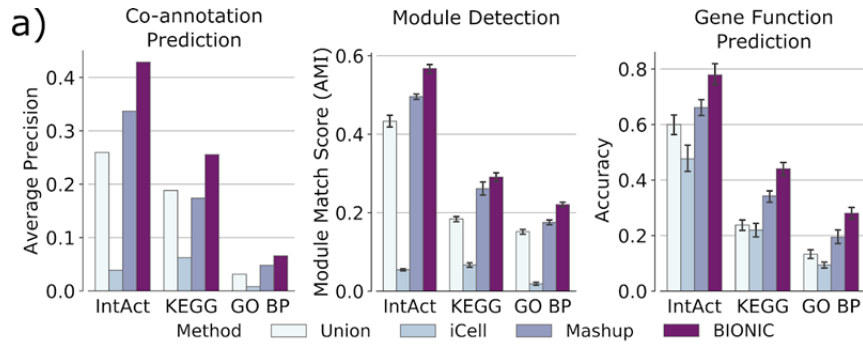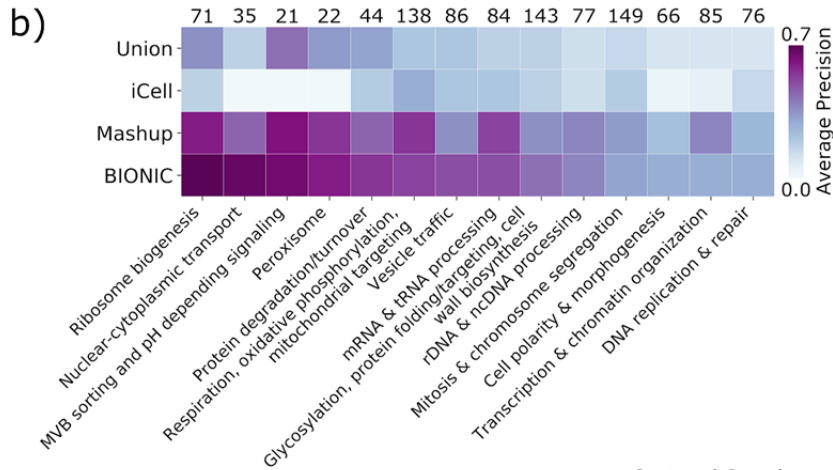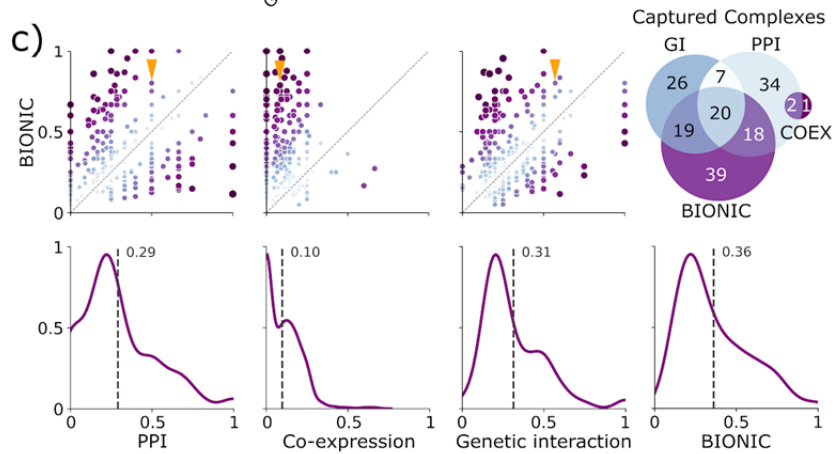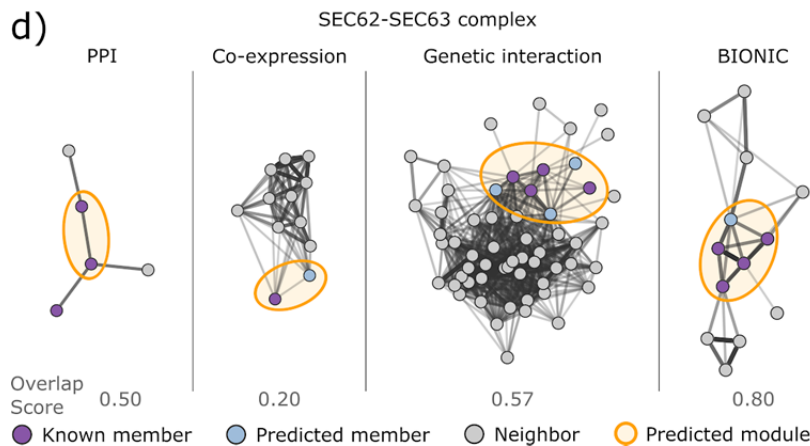

727  
728  
729  
730  
731  
732  
733  
734  
735  
736  
737  
738  
739  
740  
741  
742  
743  
744  
745  
746  
747  
748  
749  
750  
751  
752  
753

**Figure 2.** **a)** Co-annotation prediction, module detection, and gene function prediction evaluations for three yeast networks integrated by the tested unsupervised network integration methods. The co-annotation and module detection standards contain between 1786 and 4170 genes overlapping the integration results. The module detection standards define between 107 and 1803 modules. The IntAct, KEGG and GO BP gene function prediction standards cover 567, 1770 and 1211 genes overlapping the integration results, and 48, 53 and 63 functional classes, respectively (see **Supplementary Data File 2**). Error bars indicate the 95% confidence interval. **b)** Evaluation of integrated features using high-level functional categories, split by category. Each category contains between 21 and 149 genes overlapping the integration results (denoted by counts above the heatmap columns, see **Supplementary Data File 2**) **c) Top row:** Comparison of overlap scores between known complexes and predicted modules, between BIONIC and the input networks. Each point is a protein complex. The x and y axes indicate the overlap (Jaccard) score, where a value of 0 indicates no members of the complex were captured, and 1 indicates the complex was captured perfectly. The diagonal indicates complexes where BIONIC and the given input network have the same score. Points above the diagonal are complexes where BIONIC outperforms the given network, and points below the diagonal are complexes where BIONIC underperforms the network. The arrows indicate the SEC62-SEC63 complex, shown in d). A Venn diagram describes the overlap of captured complexes (defined as a complex with an overlap score of 0.5 or higher) between the input networks and BIONIC integration. **Bottom row:** The distribution of overlap scores between predicted and known complexes for each network and BIONIC. The dashed line indicates the distribution mean. **d)** Functional relationships between predicted SEC62-SEC63 complex members and genes in the local neighborhood, as given by the three input networks and corresponding BIONIC integration of these networks. The predicted cluster best matching the SEC62-SEC63 complex in each network, based on the module detection analysis in a), is circled. The overlap score of the predicted module with the SEC62-SEC63 complex is shown. Edges correspond to protein-protein interactions in PPI<sup>5</sup>, Pearson correlation between gene profiles in Co-expression<sup>9</sup> and Genetic Interaction<sup>11</sup> networks, and cosine similarity between gene features in the BIONIC integration. Edge weight corresponds to the strength of the functional relationship (correlation), where a heavier edge implies a stronger functional connection. PPI = Protein-protein interaction, GO = Gene Ontology, BP = Biological process.

754

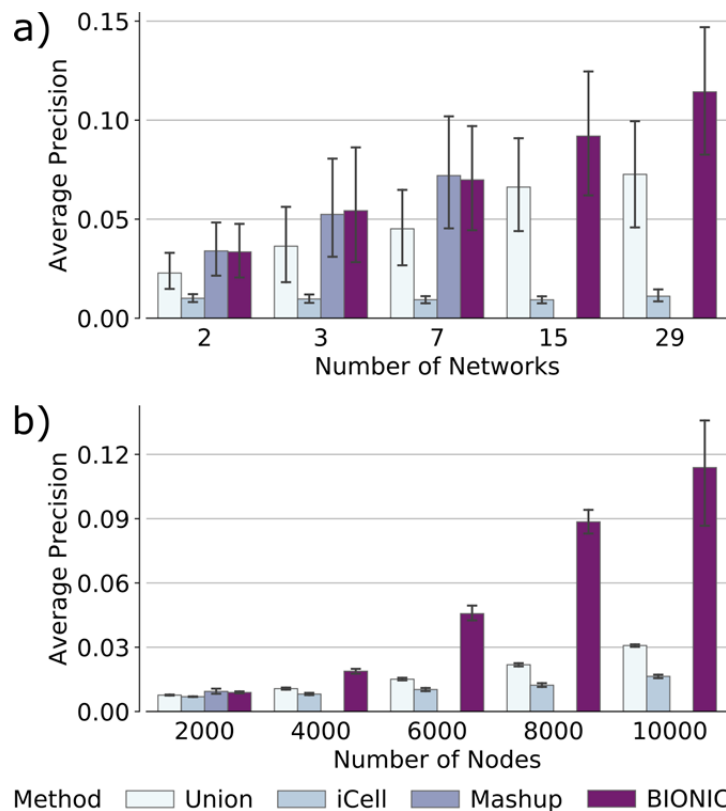

755

756

757

758

759

760

761

762

763

764

765

766

767

768

769

770

771

772

773

774

775

776

777

778

779

780

Figure 3. **a)** Performance of integrating various numbers of randomly sampled yeast co-expression input networks on KEGG Pathways gene co-annotations. **b)** Performance of integrating four human protein-protein interaction networks over a range of sub-sampled nodes (genes) on CORUM Complexes protein co-annotations. In these experiments the Mashup method failed to scale to **a)** 15 or more networks and **b)** 4000 or more nodes, as indicated by the absence of bars in those cases (see **Methods**). Error bars indicate the 95% confidence interval.
